# Supplementary material
Source: PubMed Central journal article supplement (PMC4241452)
Supplement: mmc1.pdf [file mmc1.pdf]

## SUPPORTING INFORMATION

### Neutron reflectometry studies define prion protein N-terminal peptide membrane binding

Anton P. Le Brun, Cathryn L. Haigh, Simon C. Drew, Michael James, Martin P. Boland and Steven J. Collins

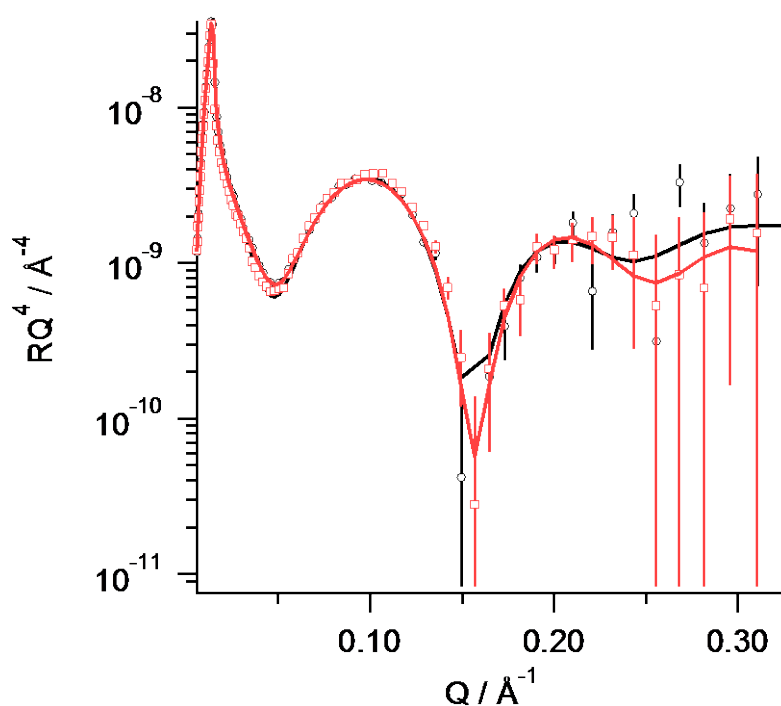

**Supplementary Figure 1.** Neutron reflectometry of the N2 peptide binding to solid-supported  $d_{31}$ -POPC membranes on silicon. The symbols with error bars are the data and the solid lines the fit. Black ( $\circ$ ) is the bilayer before peptide addition in  $D_2O$  and red ( $\square$ ) is the bilayer in the presence of N2 peptide in  $D_2O$ .

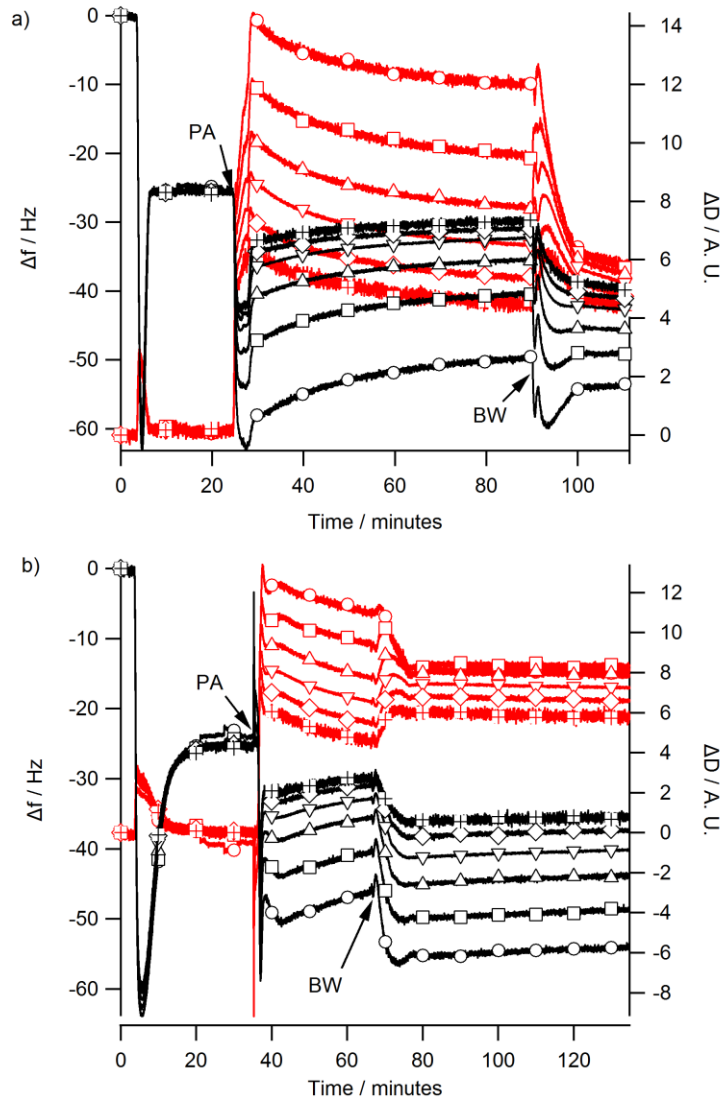

**Supplementary Figure S2:** QCM-D trace of melittin binding to a) POPC/POPS (2:1) bilayer and b) POPC/POPG (2:1) bilayer. The left axis is  $\Delta f$  (black traces) and the right axis is  $\Delta D$  (red traces). The 3<sup>rd</sup> (○), 5<sup>th</sup> (□), 7<sup>th</sup> (△), 9<sup>th</sup> (▽), 11<sup>th</sup> (◇) and 13<sup>th</sup> (+) overtones are shown. The arrows denote the point of peptide addition (PA) and buffer wash (BW).

**Supplementary Table 1.** Peptide and lipid properties.

|                                         | Molecular weight / Da | Volume / Å <sup>3</sup> | nSLD in D <sub>2</sub> O / ×10 <sup>-6</sup> Å <sup>-2</sup> | nSLD in H <sub>2</sub> O / ×10 <sup>-6</sup> Å <sup>-2</sup> | Number of exchangeable protons |
|-----------------------------------------|-----------------------|-------------------------|--------------------------------------------------------------|--------------------------------------------------------------|--------------------------------|
| N1 peptide                              | 9149                  | 10669                   | 3.88                                                         | 2.30                                                         | 162                            |
| N2 peptide                              | 6808                  | 7873                    | 3.90                                                         | 2.38                                                         | 115                            |
| dOR peptide                             | 5297                  | 3494                    | 3.89                                                         | 2.12                                                         | 106                            |
| d <sub>31</sub> -palmitoyl-oleoyl tails | 482                   | 944                     | 3.19                                                         | 3.19                                                         | 0                              |
| POPC headgroups                         | 311                   | 319                     | 1.88                                                         | 1.88                                                         | 0                              |
| POPG headgroups                         | 299                   | 257                     | 3.59                                                         | 2.78                                                         | 2                              |
| POPS headgroups                         | 244                   | 312                     | 3.89                                                         | 3.47                                                         | 1                              |

**Supplementary Table 2.** The fitted parameters for N1 peptide binding to d<sub>31</sub>-POPC/d<sub>31</sub>-POPG (2:1) d<sub>31</sub>-POPC/d<sub>31</sub>-POPS (2:1) bilayers.

| Layer                                                        | Before N1 peptide addition |                                                                       |                  | In the presence of N1 peptide |                                                                          |                                                                       |                  |
|--------------------------------------------------------------|----------------------------|-----------------------------------------------------------------------|------------------|-------------------------------|--------------------------------------------------------------------------|-----------------------------------------------------------------------|------------------|
|                                                              | Thickness<br>s / Å         | nSLD<br>in D <sub>2</sub> O<br>/ ×10 <sup>-6</sup><br>Å <sup>-2</sup> | Roughness<br>/ Å | Thickness<br>/ Å              | nSLD<br>in<br>D <sub>2</sub> O /<br>×10 <sup>-6</sup><br>Å <sup>-2</sup> | nSLD<br>in H <sub>2</sub> O<br>/ ×10 <sup>-6</sup><br>Å <sup>-2</sup> | Roughness<br>/ Å |
| <b>d<sub>31</sub>-POPC/d<sub>31</sub>-POPG (2:1) bilayer</b> |                            |                                                                       |                  |                               |                                                                          |                                                                       |                  |
| Head<br>group one                                            | 15 ± 1                     | 2.65 ±<br>0.07                                                        | 3                | 18 ± 1                        | 3.87 ±<br>0.06                                                           | 2.14 ±<br>0.03                                                        | 4                |
| Tails                                                        | 20 ± 1                     | 3.19 ±<br>0.05                                                        | 3                | 23 ± 1                        | 3.20 ±<br>0.03                                                           | 3.20 ±<br>0.03                                                        | 4                |
| Head<br>group two<br>(plus N1<br>peptide)                    | 10 ± 1                     | 4.73 ±<br>0.12                                                        | 3                | 7 ± 1                         | 4.15 ±<br>0.05                                                           | 1.18 ±<br>0.22                                                        | 4                |
| N1 peptide<br>only                                           | -                          | -                                                                     | -                | 21 ± 2                        | 5.86 ±<br>0.04                                                           | 0.01 ±<br>0.07                                                        | 5                |
| <b>d<sub>31</sub>-POPC/d<sub>31</sub>-POPS (2:1) bilayer</b> |                            |                                                                       |                  |                               |                                                                          |                                                                       |                  |
| Head<br>group one                                            | 7 ± 1                      | 2.71 ±<br>0.17                                                        | 3                | 8 ± 1                         | 2.60 ±<br>0.09                                                           | 2.52 ±<br>0.04                                                        | 4                |
| Tails                                                        | 20 ± 1                     | 3.19 ±<br>0.06                                                        | 3                | 29 ± 1                        | 3.19 ±<br>0.03                                                           | 2.97 ±<br>0.03                                                        | 4                |
| Head<br>group two<br>(plus N1<br>peptide)                    | 11 ± 1                     | 2.73 ±<br>0.14                                                        | 3                | 9 ± 1                         | 4.92 ±<br>0.09                                                           | 1.71 ±<br>0.07                                                        | 4                |
| N1 peptide<br>only                                           | -                          | -                                                                     | -                | 21 ± 1                        | 5.61 ±<br>0.05                                                           | 0.43 ±<br>0.13                                                        | 5                |

**Supplementary Table 3.** The fitted parameters for N2 peptide binding to d<sub>31</sub>-POPC/d<sub>31</sub>-POPG (2:1) d<sub>31</sub>-POPC/d<sub>31</sub>-POPS (2:1) bilayers.

| Layer                                                                    | Before N2 peptide addition |                                                                       |                  | In the presence of N2 peptide |                                                                          |                                                                       |                  |
|--------------------------------------------------------------------------|----------------------------|-----------------------------------------------------------------------|------------------|-------------------------------|--------------------------------------------------------------------------|-----------------------------------------------------------------------|------------------|
|                                                                          | Thickness<br>s / Å         | nSLD<br>in D <sub>2</sub> O<br>/ ×10 <sup>-6</sup><br>Å <sup>-2</sup> | Roughness<br>/ Å | Thickness<br>/ Å              | nSLD<br>in<br>D <sub>2</sub> O /<br>×10 <sup>-6</sup><br>Å <sup>-2</sup> | nSLD<br>in H <sub>2</sub> O<br>/ ×10 <sup>-6</sup><br>Å <sup>-2</sup> | Roughness<br>/ Å |
| <b>d<sub>31</sub>-POPC/d<sub>31</sub>-POPG (2:1) bilayer<sup>a</sup></b> |                            |                                                                       |                  |                               |                                                                          |                                                                       |                  |
| Head<br>group one                                                        | 7 ± 1                      | 4.13 ±<br>0.09                                                        | 3                | 7 ± 1                         | 4.14 ±<br>0.17                                                           | -                                                                     | 4                |
| Tails                                                                    | 27 ± 1                     | 3.20 ±<br>0.05                                                        | 3                | 31 ± 1                        | 3.04 ±<br>0.07                                                           | -                                                                     | 4                |
| Head<br>group two<br>(plus N2<br>peptide)                                | 11 ± 1                     | 2.97 ±<br>0.11                                                        | 3                | 12 ± 1                        | 3.70 ±<br>0.13                                                           | -                                                                     | 4                |
| N2 peptide<br>only                                                       | -                          | -                                                                     | -                | 27 ± 3                        | 5.85 ±<br>0.08                                                           | -                                                                     | 5                |
| <b>d<sub>31</sub>-POPC/d<sub>31</sub>-POPS (2:1) bilayer</b>             |                            |                                                                       |                  |                               |                                                                          |                                                                       |                  |
| Head<br>group one                                                        | 13 ± 1                     | 2.93 ±<br>0.06                                                        | 3                | 12 ± 1                        | 3.83 ±<br>0.08                                                           | 2.32 ±<br>0.07                                                        | 4                |
| Tails                                                                    | 26 ± 1                     | 3.26 ±<br>0.04                                                        | 3                | 27 ± 1                        | 3.28 ±<br>0.04                                                           | 2.51 ±<br>0.04                                                        | 4                |
| Head<br>group two<br>(plus N2<br>peptide)                                | 18 ± 1                     | 5.43 ±<br>0.05                                                        | 3                | 16 ± 1                        | 4.26 ±<br>0.06                                                           | 2.42 ±<br>0.06                                                        | 4                |
| N2 peptide<br>only                                                       | -                          | -                                                                     | -                | 20 ± 2                        | 5.81 ±<br>0.07                                                           | 0.85 ±<br>0.17                                                        | 5                |

<sup>a</sup> No H<sub>2</sub>O contrast data for d<sub>31</sub>-POPC/d<sub>31</sub>-POPG (2:1) bilayer.

**Supplementary Table 4:** Results from QCM-D experiments. Numbers in brackets are standard deviation from n = 4.

| Bilayer and peptide | Mass of bilayer / mg m <sup>-2</sup> | Mass of peptide / mg m <sup>-2</sup> | Moles of bilayer / μmol m <sup>-2</sup> | Moles of peptide / μmol m <sup>-2</sup> | Lipid to peptide ratio |
|---------------------|--------------------------------------|--------------------------------------|-----------------------------------------|-----------------------------------------|------------------------|
| POPC/POPG + N1      | 5.26 (0.19)                          | 0.83 (0.06)                          | 6.73 (0.25)                             | 0.09 (0.01)                             | 0.014 (0.001)          |
| POPC/POPS + N1      | 4.54 (0.06)                          | 3.19 (1.39)                          | 5.92 (0.07)                             | 0.35 (0.15)                             | 0.059 (0.026)          |
| DMPC/DMPG +N1       | 5.14 (0.10)                          | 3.08 (1.12)                          | 7.62 (0.15)                             | 0.34 (0.12)                             | 0.044 (0.016)          |
| POPC/POPG +N2       | 5.17 (0.03)                          | 0.63 (0.25)                          | 6.62 (0.04)                             | 0.09 (0.03)                             | 0.014 (0.006)          |
| POPC/POPS +N2       | 4.62 (0.09)                          | 1.82 (0.16)                          | 6.02 (0.12)                             | 0.27 (0.02)                             | 0.044 (0.005)          |
| DMPC/DMPG +N2       | 5.10 (0.13)                          | 0.83 (0.18)                          | 7.56 (0.20)                             | 0.12 (0.03)                             | 0.016 (0.003)          |
